# Supplementary material for: Rate-induced tipping cascades arising from interactions between the Greenland Ice Sheet and the Atlantic Meridional Overturning Circulation
Source: Copernicus journal article supplement (doi:10.5194/esd-15-635-2024), 2024-05-27
Supplement: Supplementary file 1 [file esd-15-635-2024-supplement.pdf]

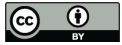

*Supplement of*

## **Rate-induced tipping cascades arising from interactions between the Greenland Ice Sheet and the Atlantic Meridional Overturning Circulation**

**Ann Kristin Klose et al.**

*Correspondence to:* Ann Kristin Klose ([annkristin.klose@pik-potsdam.de](mailto:annkristin.klose@pik-potsdam.de)) and Ricarda Winkelmann ([ricarda.winkelmann@pik-potsdam.de](mailto:ricarda.winkelmann@pik-potsdam.de))

The copyright of individual parts of the supplement might differ from the article licence.

## S1 Parameters for the AMOC box model and flowline model of the Greenland Ice Sheet

**Table S1.** Parameters of the AMOC box model (Eq. (4)–(11)) and the flowline model of the Greenland Ice Sheet (Eq. (1)–(3)). The AMOC box model parameters were determined by a calibration of the AMOC box model to a quasi–equilibrated ocean obtained from the coarse–resolution AOGCM FAMOUS<sub>B</sub> (Smith, 2012) under preindustrial atmospheric CO<sub>2</sub> concentration conditions (Wood et al., 2019). Note that 1.0 Sv corresponds to  $10^6 \text{ m}^3 \text{ s}^{-1}$ . For details on the calibration procedure it is referred to Wood et al. (2019).

| AMOC box model |                         |                                                               | Flowline model of the Greenland Ice Sheet |            |                                                |
|----------------|-------------------------|---------------------------------------------------------------|-------------------------------------------|------------|------------------------------------------------|
| $\alpha$       | 0.12                    | $\text{kg m}^{-3} \text{ }^\circ\text{C}^{-1}$                | $A$                                       | $10^{-16}$ | $\text{a}^{-1} \text{ Pa}^{-3}$                |
| $\beta$        | 0.79                    | $\text{kg m}^{-3} \text{ psu}^{-1}$                           | $n$                                       | 3          | –                                              |
| $S_0$          | 35                      | psu                                                           | $\rho$                                    | 916.7      | $\text{kg m}^{-3}$                             |
| $T_S$          | 4.773                   | $^\circ\text{C}$                                              | $L$                                       | 600        | km                                             |
| $T_0$          | 2.650                   | $^\circ\text{C}$                                              | $g$                                       | 9.81       | $\text{m s}^{-2}$                              |
| $\eta$         | 74.492                  | Sv                                                            | $\Gamma$                                  | 5          | $^\circ\text{C km}^{-1}$                       |
| $K_N$          | 5.456                   | Sv                                                            | $\gamma$                                  | 4.4        | $\text{cm a}^{-1} \text{ }^\circ\text{C}^{-1}$ |
| $K_S$          | 5.447                   | Sv                                                            |                                           |            |                                                |
| $K_{IP}$       | 96.817                  | Sv                                                            |                                           |            |                                                |
| $\lambda$      | $2.79 \times 10^7$      | $\text{m}^6 \text{ kg}^{-1} \text{ s}^{-1}$                   |                                           |            |                                                |
| $\kappa$       | 0.39                    | –                                                             |                                           |            |                                                |
| $\mu$          | 5.5                     | $^\circ\text{C}^{-1} \text{ m}^{-3} \text{ s} \times 10^{-8}$ |                                           |            |                                                |
| $V_N$          | $3.261 \times 10^{16}$  | $\text{m}^3$                                                  |                                           |            |                                                |
| $V_T$          | $7.777 \times 10^{16}$  | $\text{m}^3$                                                  |                                           |            |                                                |
| $V_S$          | $8.897 \times 10^{16}$  | $\text{m}^3$                                                  |                                           |            |                                                |
| $V_{IP}$       | $22.02 \times 10^{16}$  | $\text{m}^3$                                                  |                                           |            |                                                |
| $V_B$          | $86.490 \times 10^{16}$ | $\text{m}^3$                                                  |                                           |            |                                                |

**Table S2.** Initial conditions for the salinities of the AMOC box model (Eq. (4)–(11)) as given in Alkhayuon et al. (2019) determining the constant total salt content  $C$ .

| Parameter |        |     |
|-----------|--------|-----|
| $S_N$     | 34.912 | psu |
| $S_T$     | 35.435 | psu |
| $S_S$     | 34.427 | psu |
| $S_{IP}$  | 34.668 | psu |
| $S_B$     | 34.538 | psu |

**Table S3.** Surface freshwater fluxes (Eq. (11)) applied to the AMOC box model (Eq. (4)–(11)) following Wood et al. (2019).

| Parameter  | Preindustrial FAMOUS <sub>B</sub> |    |
|------------|-----------------------------------|----|
| $F_{N_0}$  | 0.384                             | Sv |
| $F_{S_0}$  | 1.078                             | Sv |
| $F_{T_0}$  | -0.723                            | Sv |
| $F_{IP_0}$ | -0.739                            | Sv |
| $A_N$      | 0.070                             | –  |
| $A_S$      | -0.257                            | –  |
| $A_T$      | 0.752                             | –  |
| $A_{IP}$   | -0.565                            | –  |

**S2 Effects of varying coupling strength and rates of GIS surface mass balance decrease on emergent dynamics regimes**

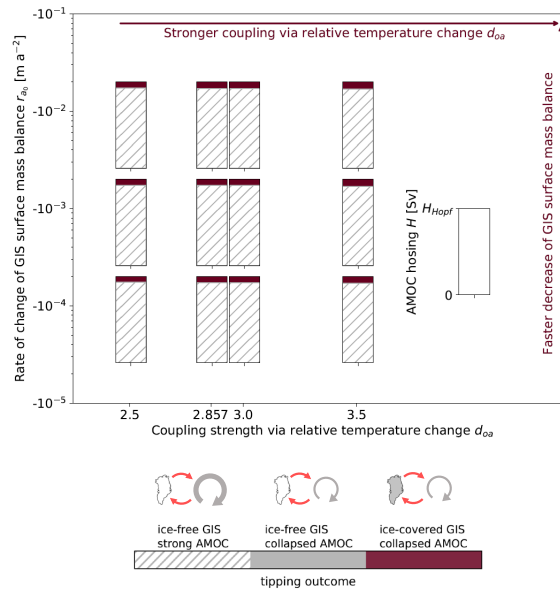

**Figure S1. Emergent dynamics regimes of the Greenland Ice Sheet and the Atlantic Meridional Overturning Circulation for bidirectional coupling.** Tipping outcomes in response to a limited linear decrease of the Greenland Ice Sheet surface mass balance on the ground with a ramping rate  $r_{a_0}$  (varied along outer vertical axis) for varying coupling via relative temperature change  $d_{oa}$  (varied along the outer horizontal axis). The AMOC hosing (vertical axis of bars) is kept constant between  $H = 0$  Sv and the AMOC hosing threshold  $H_{Hopf}$ . The respective tipping outcome is indicated by the colouring (grey: GIS deglaciation, pink: no GIS deglaciation; stripes additionally indicate the AMOC in its 'on'-state).

## References

- 5 Alkhayuon, H., Ashwin, P., Jackson, L. C., Quinn, C., and Wood, R. A.: Basin bifurcations, oscillatory instability and rate-induced thresholds for Atlantic meridional overturning circulation in a global oceanic box model, *Proceedings of the Royal Society A: Mathematical, Physical and Engineering Sciences*, 475, 20190051, <https://doi.org/10.1098/rspa.2019.0051>, 2019.
- Smith, R.: The FAMOUS climate model (versions XFXWB and XFHCC): description update to version XDBUA, *Geoscientific Model Development*, 5, 269–276, <https://doi.org/10.5194/gmd-5-269-2012>, 2012.
- 10 Wood, R. A., Rodríguez, J. M., Smith, R. S., Jackson, L. C., and Hawkins, E.: Observable, low-order dynamical controls on thresholds of the Atlantic Meridional Overturning Circulation, *Climate Dynamics*, 53, 6815–6834, <https://doi.org/10.1007/s00382-019-04956-1>, 2019.
